# Supplementary material for: miR‐154‐5p Affects the TGFβ1/Smad3 Pathway on the Fibrosis of Diabetic Kidney Disease via Binding E3 Ubiquitin Ligase Smurf1
Source: Hindawi journal article supplement (doi:10.1155/2022/7502632), 2022-01-01
Supplement: f1 [file 7502632.f1.pdf]

# RNA22 v2 results

Results have been computed and are shown below. If there are no results shown, it means your chosen parameters yielded no results. Note: The p-value represents the likelihood that the target site loci is random. That is, a lower p-value represents a greater chance that the loci contains a valid MRE.

| miR Name                       | transcript name | leftmost position of predicted target site | folding energy (in-Kcal/mol) | heteroduplex                                                    | p value |
|--------------------------------|-----------------|--------------------------------------------|------------------------------|-----------------------------------------------------------------|---------|
| hsa_miR_154_5p<br>MIMAT0000452 | hsa_SMURF1      | 985                                        | -18.40                       | CAA TGG TGA --AA GGA TAA CCT C<br>GCT TCC GTT GTG CCT ATT GGA T | 9.15E-2 |

| miR Name                       | transcript name | leftmost position of predicted target site | folding energy (in-Kcal/mol) | heteroduplex                                                       | p value |
|--------------------------------|-----------------|--------------------------------------------|------------------------------|--------------------------------------------------------------------|---------|
| rno_miR_154_5p<br>MIMAT0000856 | rno_SMURF1      | 72                                         | -18.30                       | CGC ATG GCG G--G CCG A--G GCC TG<br>GC-- TTC CGT TGT GCC TAT TGGAT | 1.69E-1 |
| rno_miR_154_5p<br>MIMAT0000856 | rno_SMURF1      | 327                                        | -16.70                       | CGA GGG T--T TGC G---- TGG CCT C<br>GCT TCC GTT GTG CCT ATT GGA T  | 3.45E-2 |
| rno_miR_154_5p<br>MIMAT0000856 | rno_SMURF1      | 1715                                       | -17.10                       | AAA AGG CG-- CAA GGA --AG CCT G<br>GCT TCC GTT GTG CCT ATT GGA T   | 3.06E-1 |
