# Supplementary material for: miR‐154‐5p Affects the TGFβ1/Smad3 Pathway on the Fibrosis of Diabetic Kidney Disease via Binding E3 Ubiquitin Ligase Smurf1
Source: Hindawi journal article supplement (doi:10.1155/2022/7502632), 2022-01-01

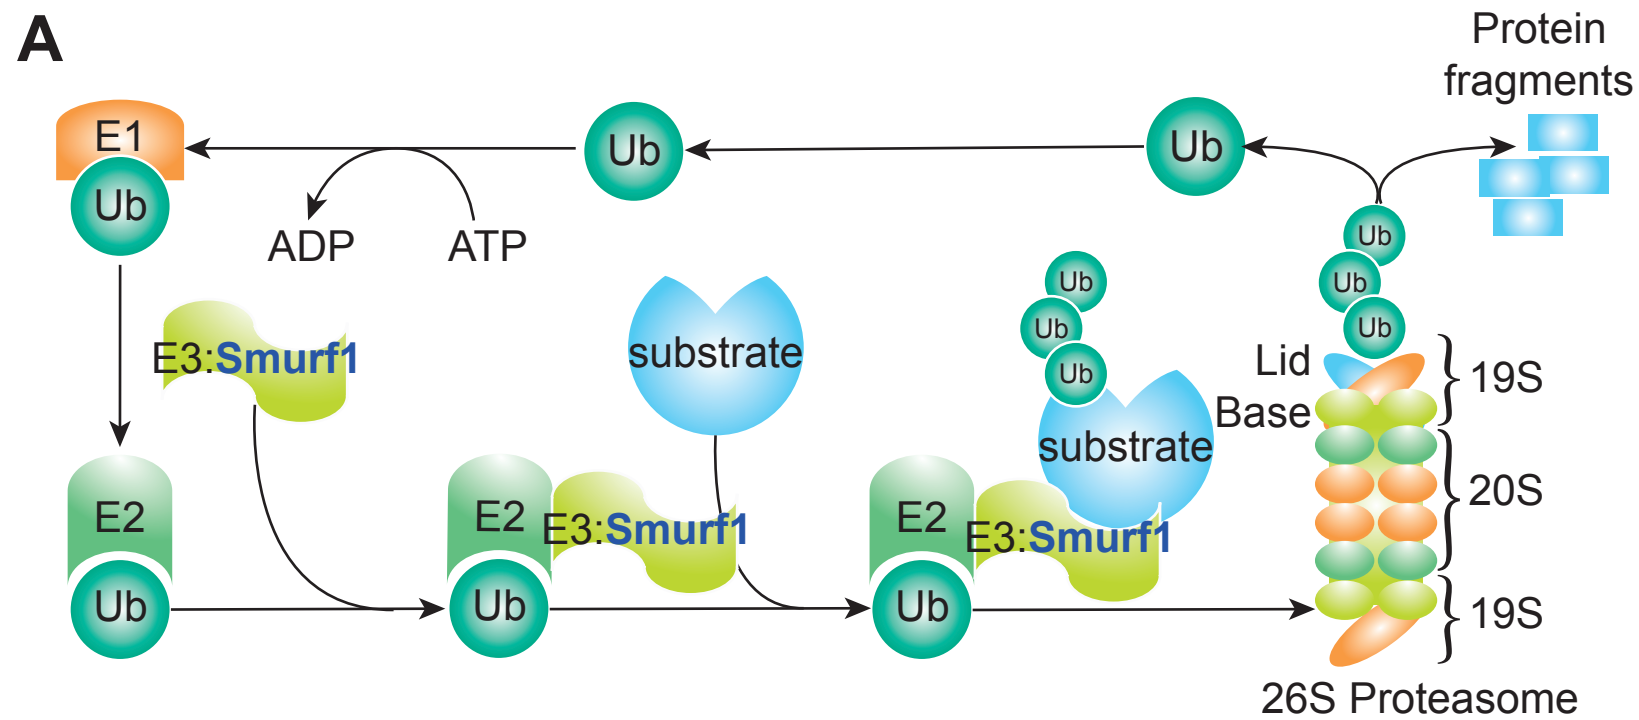

TGF beta Signaling Pathway

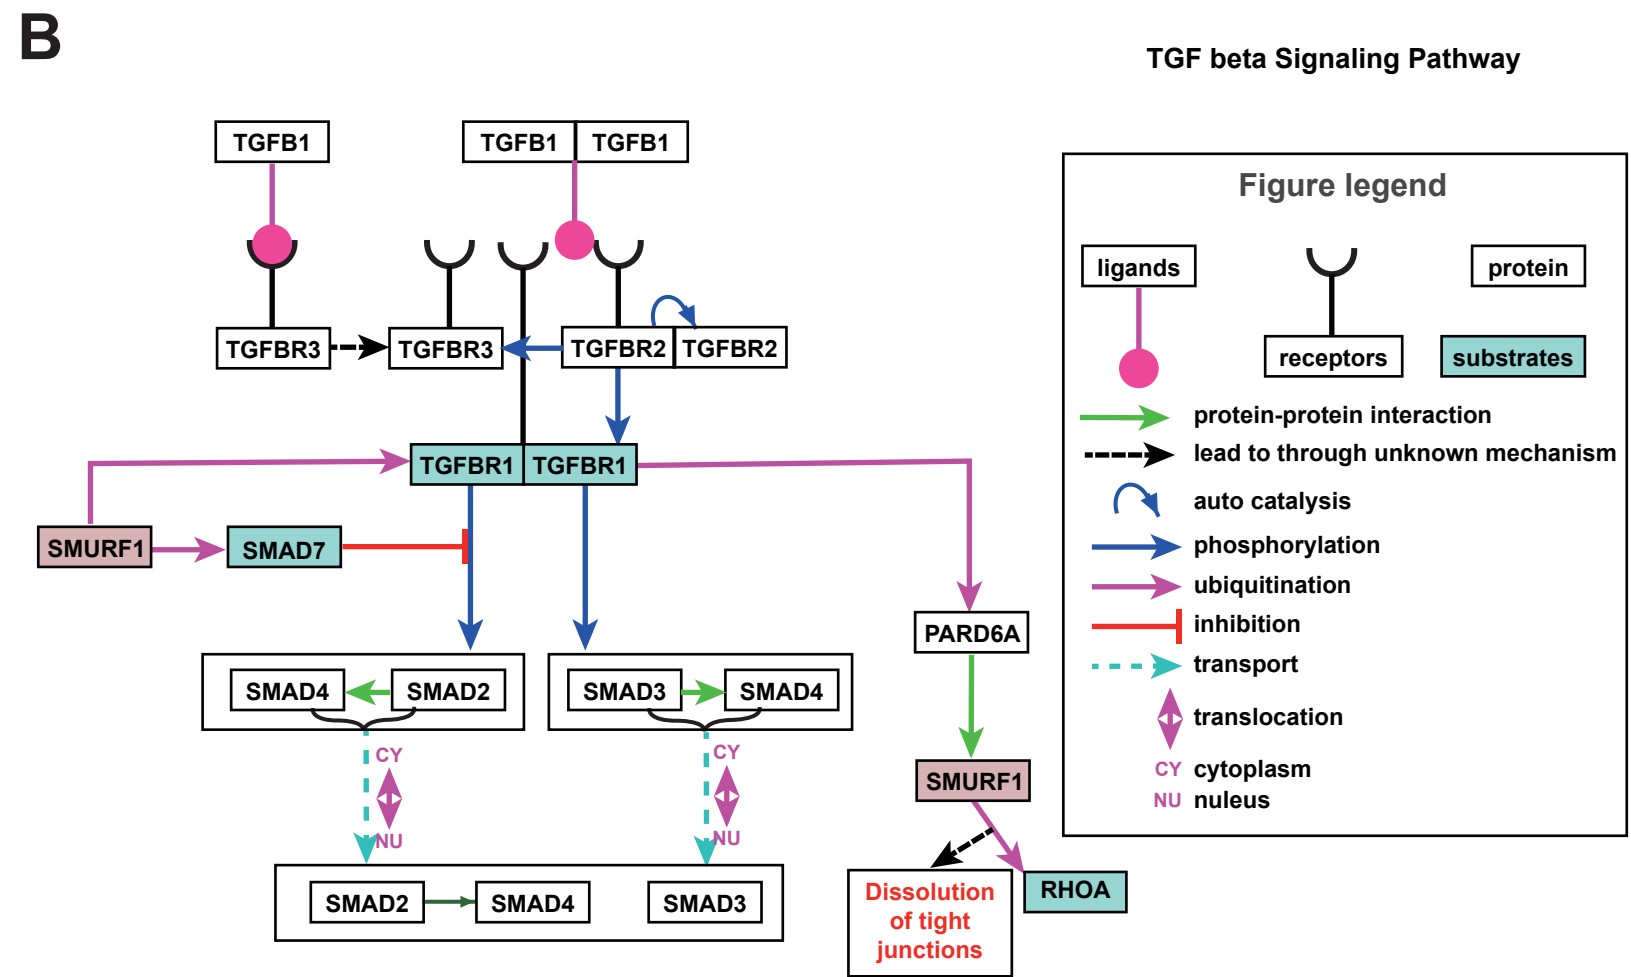

Supplement: f2 [file 7502632.f2.pdf]
